# Supplementary material for: MICROSCOPIC ANALYSIS OF 30.3-MeV INELASTIC PROTON SCATTERING BY LIGHT NUCLEI.
Source: Royal Society of Chemistry journal article supplement (doi:10.1039/c3cp50968k), 1971-01-01
Supplement: c3cp50968k.pdf [file c3cp50968k.pdf]

## Supplementary Information

### Temperature Dependent Absorption Cross-Sections of O<sub>2</sub>-O<sub>2</sub> collision pairs between 340 and 630 nm

Ryan Thalman<sup>1,2</sup> and Rainer Volkamer<sup>1,2,\*</sup>

<sup>1</sup>Department of Chemistry and Biochemistry, University of Colorado Boulder, 215 UCB, Boulder, CO, 80309 USA

<sup>2</sup>CIRES, University of Colorado Boulder, 216 UCB, Boulder, CO, 80309 USA

\*Corresponding author e-mail: [rainer.volkamer@colorado.edu](mailto:rainer.volkamer@colorado.edu)

Table S1: Description of light sources, cavity mirrors, optical filters and spectrometer settings

| Cavity | O <sub>4</sub><br>Bands                                        | Mirror<br>Center $\lambda$ | Reflectivity<br>(Peak) | Range<br>(nm) | Filters                                                    | Resolution<br>FWHM<br>(nm) | Grating<br>(g/mm) | Light Source                    |
|--------|----------------------------------------------------------------|----------------------------|------------------------|---------------|------------------------------------------------------------|----------------------------|-------------------|---------------------------------|
| UV     | 344 <sup>a</sup> ,<br>360 <sup>a,b</sup> ,<br>380 <sup>a</sup> | 355 (ATF)                  | 0.99983                | 335-387       | Pyrex plate, 325 LPF<br>(CVD),<br>UG11 (Schott)            | 0.32                       | 1200              | Xe-arc                          |
| Blue   | 446 <sup>a</sup><br>477 <sup>b</sup>                           | 455 (ATF)                  | 0.99997                | 420-495       | GG435(Schott),<br>500SWP (Thorlabs),<br>450 BPF (Thorlabs) | 0.36                       | 1200              | LED<br>LZ1-10B205               |
| Green  | 532 <sup>a</sup>                                               | 532 (ATF)                  | 0.99998                | 510-555       | OG515 (Schott),<br>550SWP (Newport)                        | 0.38                       | 1200              | Green LED<br>LZ1-10G105         |
| Amber  | 577 <sup>b</sup>                                               | 580 (crd-<br>optics)       | 0.999978               | 550-596       | 550 LWP (Thorlabs),<br>600SWP (Thorlabs)                   | 0.38                       | 1200              | Warm White<br>LED<br>LZ1-10WW00 |
| Red    | 630 <sup>b</sup>                                               | 630 (Los-<br>Gatos)        | 0.99993                | 550-680       | 600 LWP (Thorlabs)                                         | 0.4 and<br>0.68            | 600               | Red LED<br>LZ1-10R205           |

<sup>a</sup> Measurement/Reference gas: O<sub>2</sub>/Ar; <sup>b</sup> Measurement/Reference gas: Air/N<sub>2</sub>;

Table S2: Comparison of Literature Data

| Study                                  | Year | <sup>a</sup> Temp (K) | Wavelength (nm) | Peak ( $\times 10^{-46}$ cm <sup>5</sup> molecule <sup>-2</sup> ) | Integral ( $\times 10^{-43}$ cm <sup>4</sup> molecule <sup>-2</sup> ) | Width (nm/cm <sup>-1</sup> ) |
|----------------------------------------|------|-----------------------|-----------------|-------------------------------------------------------------------|-----------------------------------------------------------------------|------------------------------|
| Salow and Steiner <sup>b</sup>         | 1936 | -                     | 343.6           | 0.99                                                              | -                                                                     | -                            |
|                                        |      |                       | 360.7           | 3.6                                                               |                                                                       |                              |
|                                        |      |                       | 380.3           | 2.1                                                               |                                                                       |                              |
|                                        |      |                       | 446.4           | 0.3                                                               |                                                                       |                              |
|                                        |      |                       | 477.0           | 5.3                                                               |                                                                       |                              |
|                                        |      |                       | 532.3           | 0.4                                                               |                                                                       |                              |
|                                        |      |                       | 577.3           | 7.7                                                               |                                                                       |                              |
|                                        |      |                       | 629.9           | 5.3                                                               |                                                                       |                              |
| Hermans <sup>b</sup>                   | 1939 | -                     | 477.3           | 8.0                                                               | -                                                                     | -                            |
|                                        |      |                       | 577.2           | 13                                                                |                                                                       |                              |
| Dianov-Klokov <sup>b</sup>             | 1964 | -                     | 630.0           | 6.2                                                               |                                                                       |                              |
|                                        |      |                       | 360.5           | 4.4                                                               | -                                                                     | -                            |
|                                        |      |                       | 380.2           | 2.2                                                               |                                                                       |                              |
|                                        |      |                       | 446.7           | 0.70                                                              |                                                                       |                              |
|                                        |      |                       | 477.3           | 5.5                                                               |                                                                       |                              |
|                                        |      |                       | 532.2           | 1.5                                                               |                                                                       |                              |
|                                        |      |                       | 577.2           | 9.8                                                               |                                                                       |                              |
|                                        |      |                       | 630.0           | 6.9                                                               |                                                                       |                              |
| Blickensderfer and Ewing (1 $\sigma$ ) | 1969 | 78                    | 477             | -                                                                 | 2.5(4)                                                                | -                            |
|                                        |      |                       | 577             |                                                                   | 6.1(4)                                                                |                              |
|                                        |      |                       | 630             |                                                                   | 5.4(6)*                                                               |                              |
|                                        |      | 300                   | 477             |                                                                   | 2.4(4)                                                                |                              |
|                                        |      |                       | 577             |                                                                   | 3.5(4)                                                                |                              |
|                                        |      |                       | 630             |                                                                   | 1.5(6)*                                                               |                              |
| Tabniz et al.                          | 1969 | 577                   | -               | -                                                                 | 4.63(7)                                                               | -                            |
|                                        |      | 630                   |                 |                                                                   | 3.47(7)                                                               |                              |
| McKellar et al.*                       | 1972 | 90                    | 477             | 17.4                                                              | 2.47                                                                  | -                            |
|                                        |      |                       | 577             | 29.2                                                              | 6.48                                                                  |                              |
|                                        |      |                       | 630             | 22                                                                | 5.03                                                                  |                              |
|                                        |      | 113                   | 477             | 11.3                                                              | 2.03                                                                  |                              |
|                                        |      |                       | 577             | 20.4                                                              | 5.52                                                                  |                              |
|                                        |      |                       | 630             | 14.1                                                              | 4.18                                                                  |                              |
|                                        |      | 295                   | 477             | 6.1                                                               | 2.18                                                                  |                              |
|                                        |      |                       | 577             | 10.8                                                              | 4.56                                                                  |                              |
|                                        |      |                       | 630             | 6.6                                                               | 3.52                                                                  |                              |
| Long and Ewing*                        | 1973 | 87                    | 577             | 35.8                                                              |                                                                       | 7.3/220                      |

|                                                               |      |     |        |            |            |            |
|---------------------------------------------------------------|------|-----|--------|------------|------------|------------|
| Perner and Platt                                              | 1980 | 279 | 343.9  | 0.70(24)   | -          | 1.6/       |
|                                                               |      |     | 360.5  | 5.4(1.5)   |            | 4.9/       |
|                                                               |      |     | 380.2  | <1.4       |            | ~6/        |
|                                                               |      |     | 444.0  | 1.0(12)    |            | 7.4/       |
|                                                               |      |     | 476.9  | 5.9(1.8)   |            | 5.8/       |
|                                                               |      |     | 575.0  | 16(6)      |            | 9.5/       |
| Greenblatt et al. (3 $\sigma$ )                               | 1990 | 296 | 343.4  | 1.2(1)     | -          | 4.2/       |
|                                                               |      |     | 360.5  | 4.1(4)     |            | 4.8/       |
|                                                               |      |     | 380.2  | 2.4(2)     |            | 4.4/       |
|                                                               |      |     | 446.7  | 0.57(6)    |            | 5.6/       |
|                                                               |      |     | 477.3  | 6.3(6)     |            | 6.2/       |
|                                                               |      |     | 532.2  | 1.0(1)     |            | 10.2/      |
|                                                               |      | 196 | 577.2  | 11(1)      |            | 11.6/      |
|                                                               |      |     | 630.0  | 7.2(7)     |            | 13.8/      |
|                                                               |      |     | 360.8  | 5.7(6)     |            | 4.2/       |
|                                                               |      |     | 380.2  | 3.7(4)     |            | 3.7/       |
|                                                               |      |     | 477.3  | 7.6(13)    |            | 4.7/       |
|                                                               |      |     | 477.3  | 7.6(13)    |            | 4.7/       |
| Volkamer (3 $\sigma$ )                                        | 1996 | 296 | 342.7  | 1.18(9)    | -          | 5.8(5)/    |
|                                                               |      |     | 360.8  | 5.42(7)    |            | 4.3(1)/    |
|                                                               |      |     | 380.2  | 2.4(2)     |            | 3.6(2)/    |
|                                                               |      |     | 477.1  | 6.1(3)     |            | 5.2(8)/    |
|                                                               |      |     | 531.7  | 1.3(3)     |            | 13(8)/     |
|                                                               |      |     | 576.9  | 10.3(3)    |            | 11.2(1)/   |
|                                                               |      |     | 630.6  | 5.5-6.9(6) |            | 14.(1)/    |
|                                                               |      |     | 630.6  | 5.5-6.9(6) |            | 14.(1)/    |
| Newnham and Ballard (3 $\sigma$ )                             | 1998 | 223 | 477    | 6.99(35)   | 1.629(21)  | 339(15)/   |
|                                                               |      |     | 532    | 1.31(20)   | 0.404(11)  | 369(6)/    |
|                                                               |      |     | 577    | 12.61(11)  | 4.3585(76) |            |
|                                                               |      |     | 630    | 8.8(13)    | 2.766(72)  |            |
|                                                               |      |     | 630*   | 8.34(83)   | 2.9227(76) |            |
|                                                               |      | 283 | 477    | 1.23(38)   | 2.483(48)  |            |
|                                                               |      |     | 532    | 11.75(20)  | 0.431(17)  |            |
|                                                               |      |     | 577    | 7.9(15)    | 4.625(14)  |            |
|                                                               |      |     | 630    |            | 2.769(99)  |            |
|                                                               |      |     | 630*   |            | 3.025(17)  |            |
| Osterkamp et al. (data extracted from Table 4 of Wagner 2002) | 1998 | 204 | 477    | 7.9(3)     |            |            |
|                                                               |      |     | 532    | 1.4(2)     |            |            |
|                                                               |      |     | 577    | 12.2(4)    |            |            |
|                                                               |      | 256 | 477    | 7.0(3)     |            |            |
|                                                               |      |     | 532    | 1.2(2)     |            |            |
| Hermans et al. <sup>c</sup>                                   | 1998 | RT  | 343.96 | 0.983      | 0.307      | 3.65/309.5 |
|                                                               |      |     | 360.89 | 4.291      | 1.578      | 4.15/319.6 |
|                                                               |      |     | 380.25 | 2.467      | 0.771      | 4.06/280.6 |
|                                                               |      |     | 446.39 | 0.502      | 0.124      | 3.97/199.1 |
|                                                               |      |     | 477.10 | 6.553      | 1.99       | 5.36/235.3 |
|                                                               |      |     | 532.36 | 0.907      | 0.29       | 8.25/292.2 |

|                                                                            |      |       |            |           |          |                    |
|----------------------------------------------------------------------------|------|-------|------------|-----------|----------|--------------------|
|                                                                            |      |       | 577.5      | 11.01     | 4.23     | 11.0/331.8         |
|                                                                            |      |       | 630.3      | 7.076     | 2.87     | 13.77/347.4        |
| Naus and Ubachs<br>(1 $\sigma$ )                                           | 1999 | 294   | 577        | 11.41(15) | 4.66(9)  | /340(3)            |
|                                                                            |      |       | 630        | 7.55(15)  | 3.19(9)  | /367(3)            |
| Tiedje et al. (1 $\sigma$ )                                                | 2001 | -     | 577        | 12.07(30) | 4.93(20) | /337(3)            |
|                                                                            |      |       | 630        | 7.71(20)  | 3.26(14) | /360(3)            |
| Wagner et al.                                                              | 2002 | 241   | 360.5      | 5.70(50)  |          |                    |
|                                                                            |      |       | 380.2      | 2.44(40)  |          |                    |
|                                                                            |      |       | 477.3      | 7.80(20)  |          |                    |
|                                                                            |      |       | 532.2      | 1.74(50)  |          |                    |
|                                                                            |      |       | 577.2      | 13.50(40) |          |                    |
|                                                                            |      |       | 630.0      | 9.61(30)  |          |                    |
| Morville et al. (1 $\sigma$ )                                              | 2002 | 296   | 576.3      | 11.22(25) | -        | /345(2)            |
|                                                                            |      |       | 629.3      | 7.2(3)    | -        | /323(15)           |
|                                                                            |      | 192.5 | 577.3      | 12.8(4)   | -        | /292(2)            |
|                                                                            |      |       | 629.3      | 8.7(3)    | -        | /281(15)           |
|                                                                            |      | 132   | 575.3      | 17.5(16)  | -        | /276(2)            |
|                                                                            |      |       | 629.3      | 11.6(1)   | -        | /173(15)           |
| Sneeps et al.<br>(294K 577 data from<br>Naus and Ubachs, /<br>1 $\sigma$ ) | 2006 | 294   | 477.79(6)  | 6.60(6)   | 2.34(6)  | 5.64(16)/247.1(68) |
|                                                                            |      |       | 577.17     | 11.5(1)   | 4.70(6)  | 11.5(1)/346.5(30)  |
|                                                                            |      | 268   | 577.3(1)   | 11.1(3)   | 4.47(13) | 11.3(2)/342.3(71)  |
|                                                                            |      | 230   | 477.47(26) | 5.78(23)  | 1.90(22) | 5.2(6)/228(26)     |
|                                                                            |      | 190   | 577.6(2)   | 12.6(5)   | 4.06(24) | 9.6(3)/290(10)     |
|                                                                            |      | 184   | 477.25(14) | 7.33(20)  | 2.07(16) | 4.5(3)/239(14)     |
| Chen and Venables                                                          | 2009 | 296   | 360.1      | 4.0       | -        | -                  |

<sup>a</sup> Temperatures are assumed to be room temperature unless reported

<sup>b</sup> Data reproduced from the MPI Mainz database

([http://www.atmosphere.mpg.de/enid/5db486bc26e00f61354f2fbe841be944,0/Spectra/Introduction\\_1rr.html](http://www.atmosphere.mpg.de/enid/5db486bc26e00f61354f2fbe841be944,0/Spectra/Introduction_1rr.html))

\*Data retrieved from digitized versions of the graphs published in these respective works.

<sup>c</sup> <http://spectrolab.aeronomie.be/o2.htm>

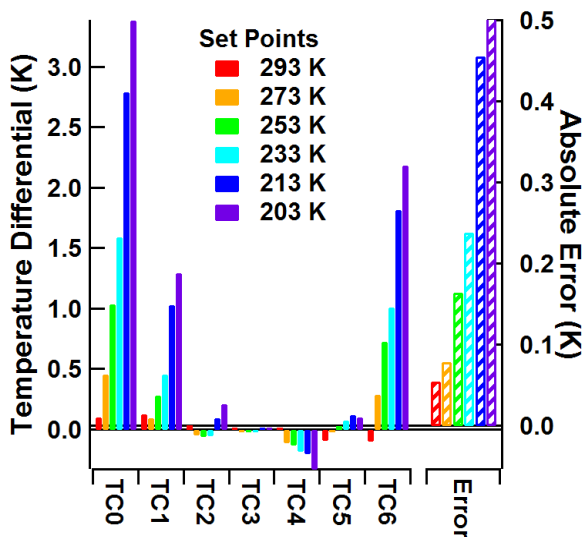

Figure S1: Temperature variation across the cavity. The 'error' denotes the integral temperature variation over length, and is given as the average error over the full cavity length in units of Kelvin. TC0 to TC6 refer to Figure 1.

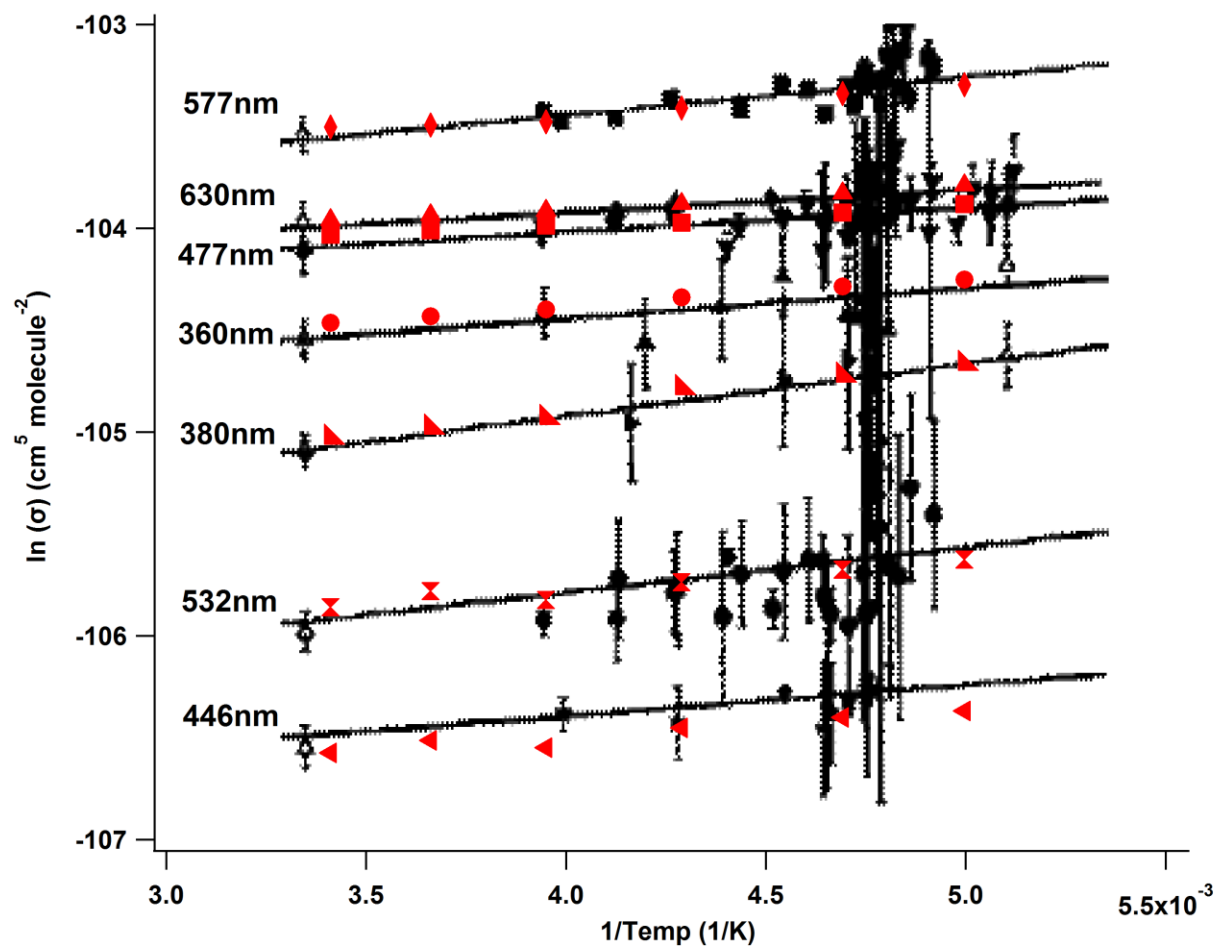

Figure S2: Comparison of Peak  $\sigma_{O_4-CIA}$  of this work to Figure 3 of Pfeilsticker et al. 2001. The red triangles represent our data, while the black circles are measurements from a balloon-borne DOAS instrument, combined with the room temperature cross-section of Greenblatt et al. (black diamonds).
